# Supplementary material
Source: Research Square preprint supplement (doi:10.21203/rs.3.rs-9585124/v1)
Supplement: Supplementary file 1 [file 3238563eef92c3623397b1f9.pdf]

Figure S1. BA.3.2 lineage tree

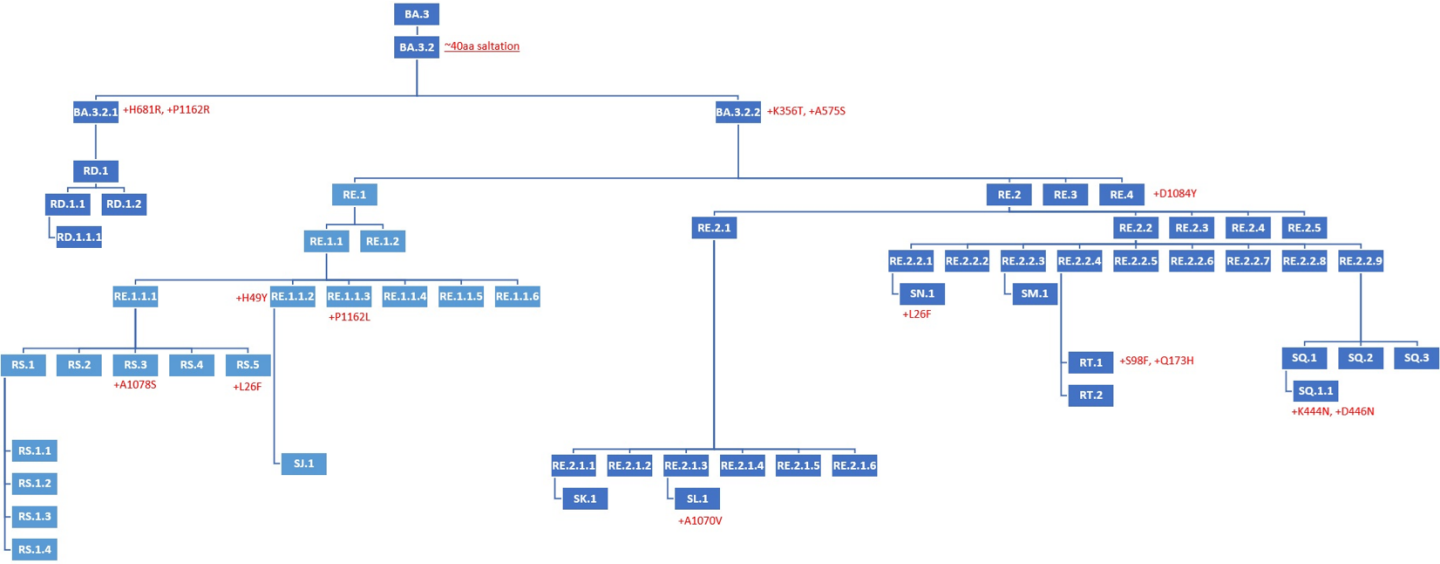

Figure S2. JN.1 mAb -4 and -5 ELISA

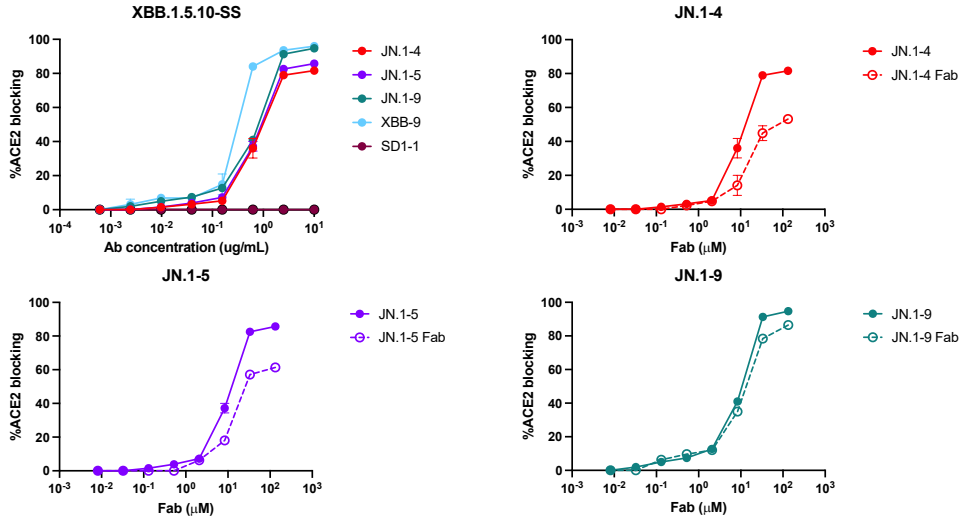

Figure S3.

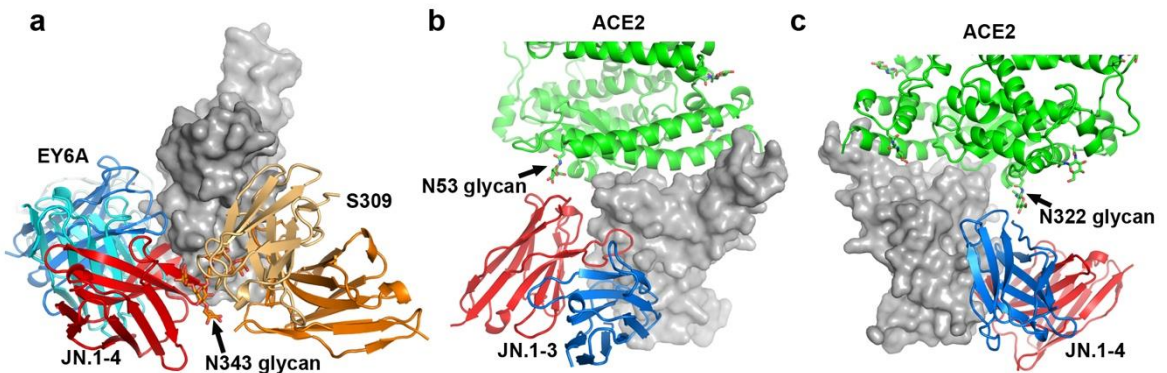

RBD-WH (Measurement 1 to 3, from left to the right)

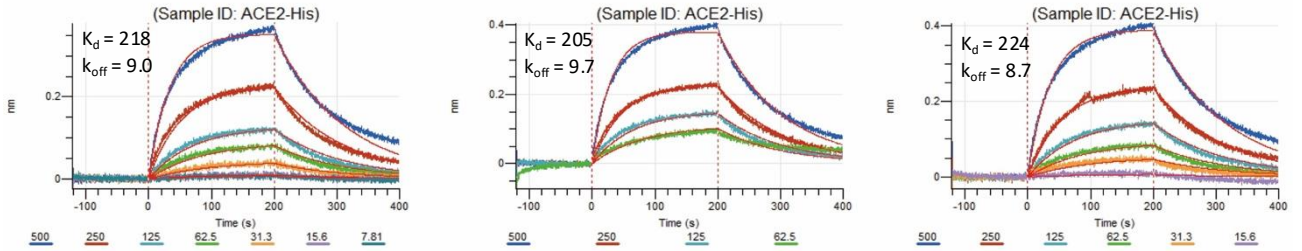

RBD-BA.1 (Measurement 1 to 3, from left to the right)

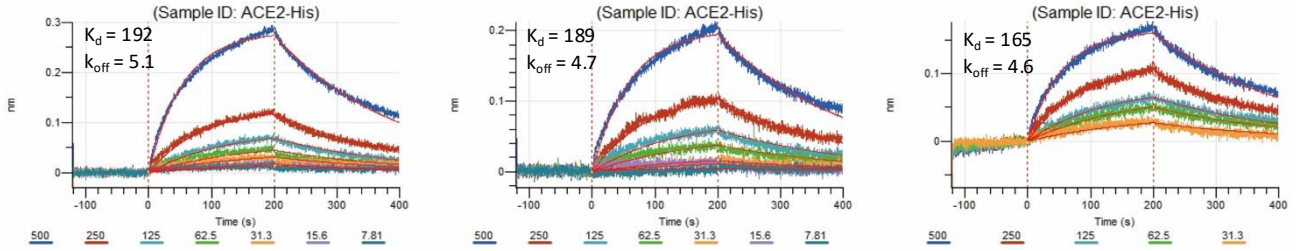

RBD-KP.3 (Measurement 1 to 3, from left to the right)

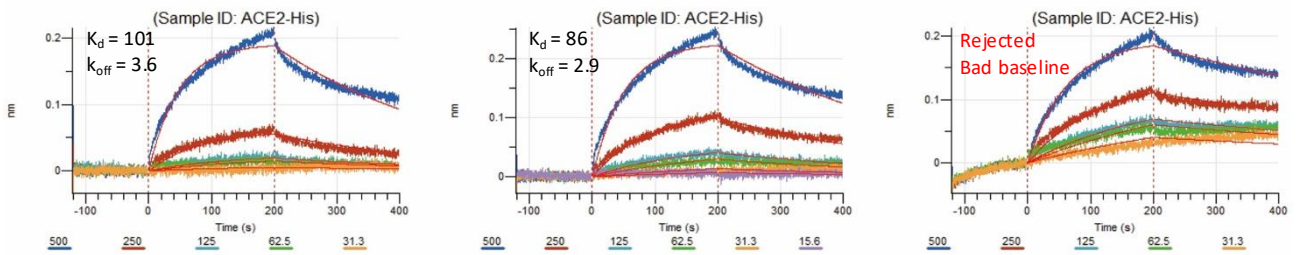

RBD-BA3.2.2 (Measurement 1 to 3, from left to the right)

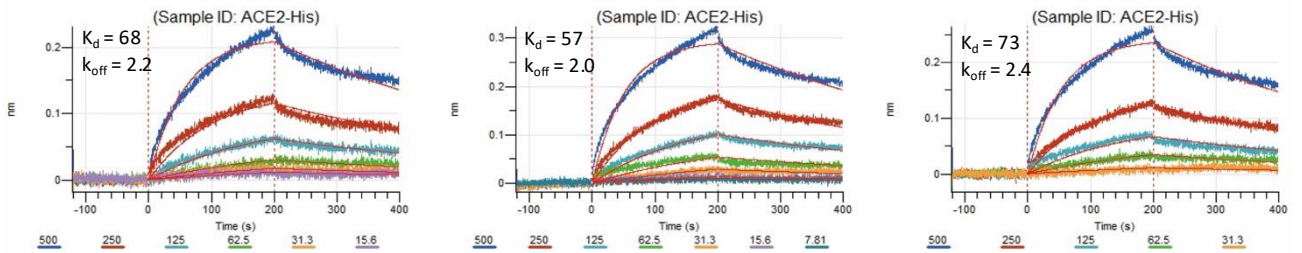

Figure S4. BLI kinetic data for RBD/ACE2 interactions.  $K_{off}$  units are E-03/s.

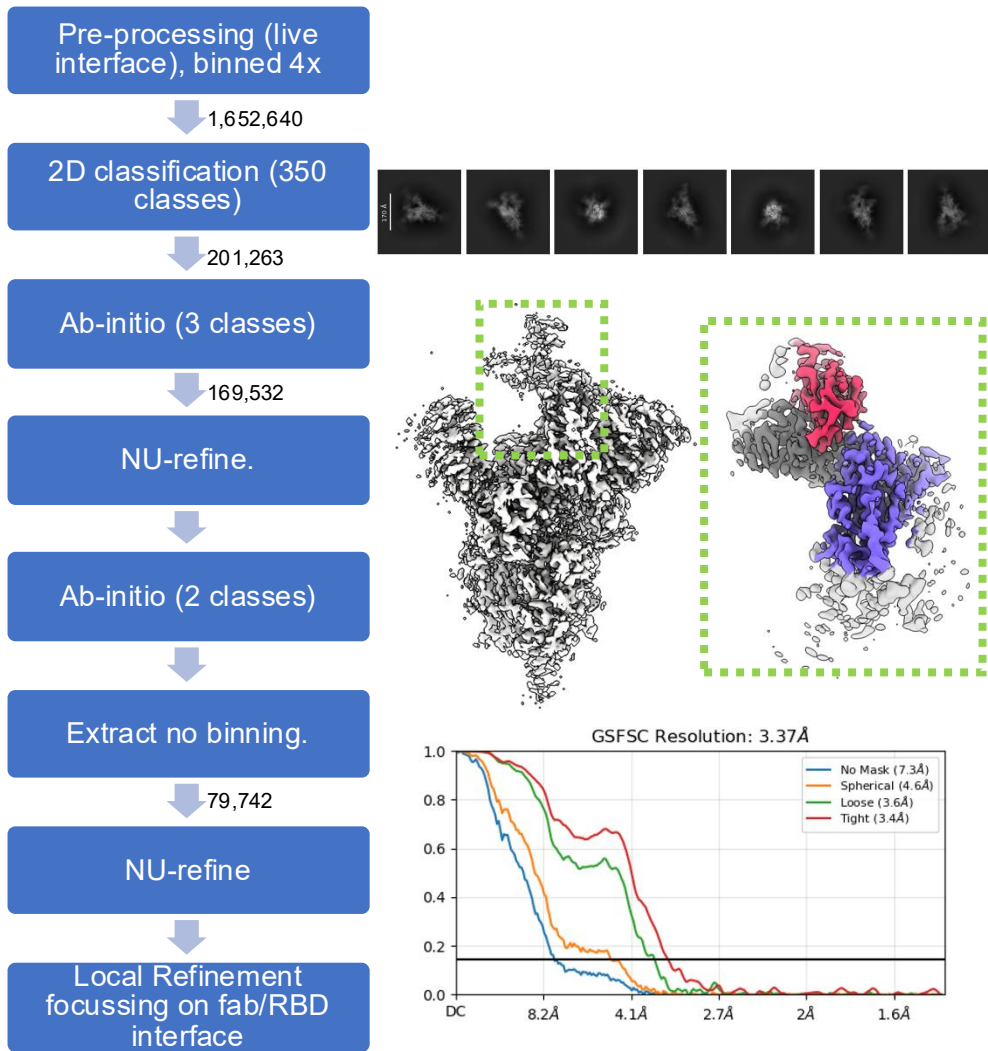

Figure S5. Workflow for processing JN1-9 with KP.3 complex. Numbers of particles after each reduction are written next to processing arrows.

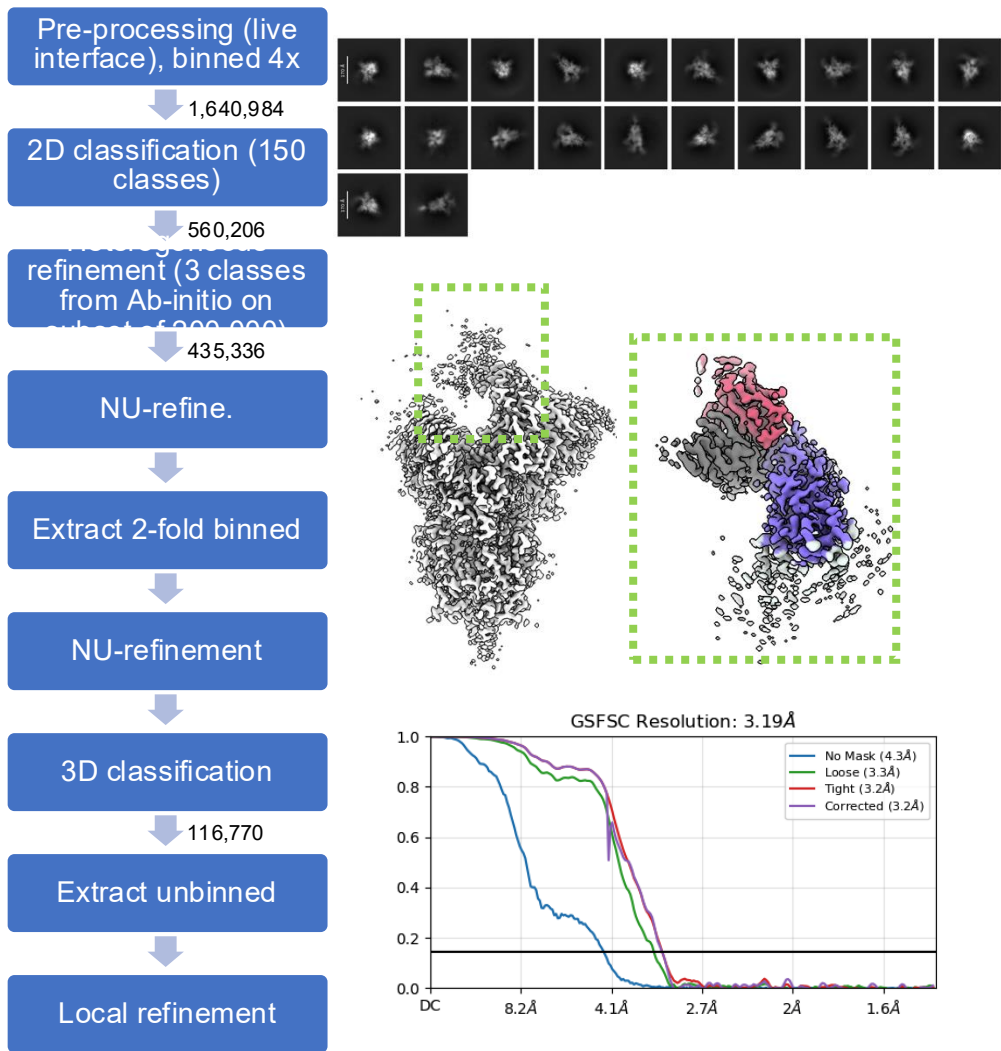

Figure S6. Workflow for processing JN1-10 with KP.3 complex. Numbers of particles after each reduction are written next to processing arrows.

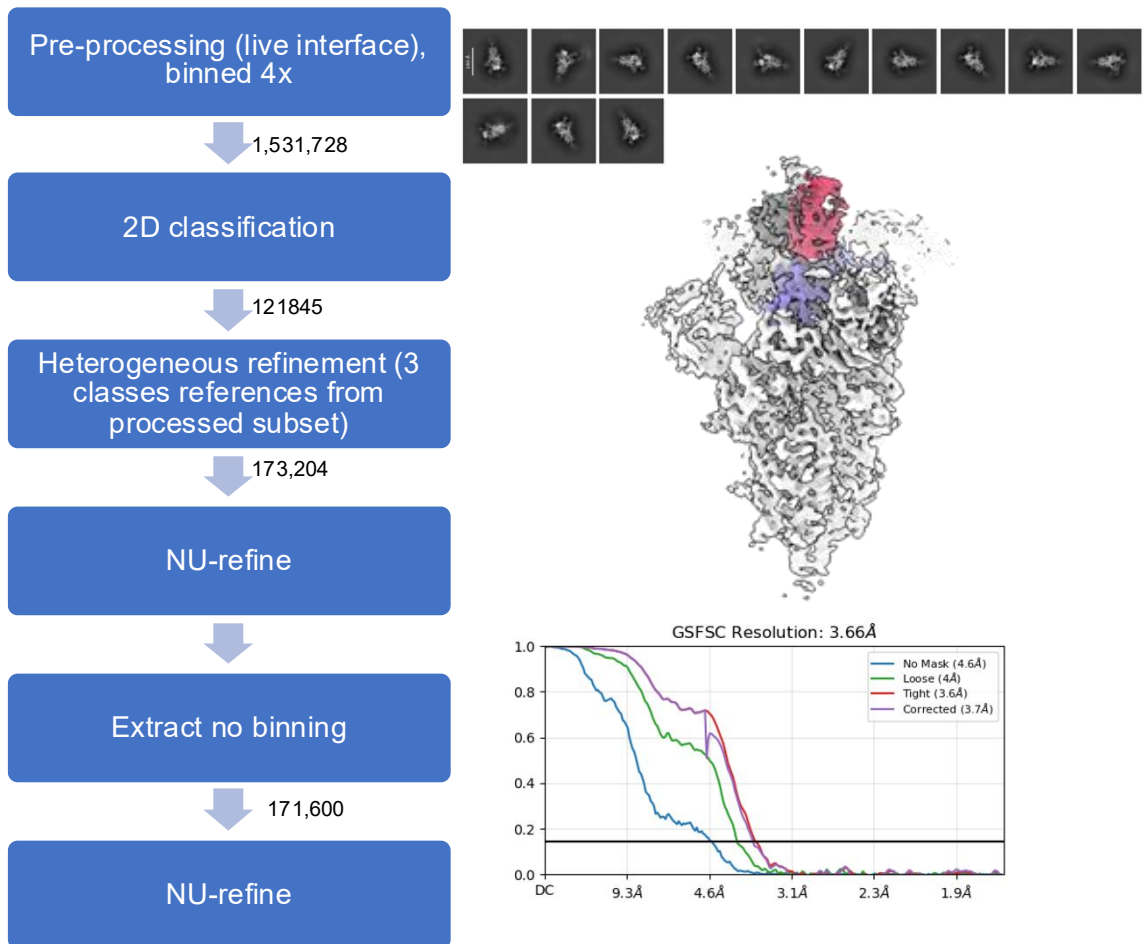

Figure S7. Workflow for processing JN1-3 with KP.3 complex. Numbers of particles after each reduction are written next to processing arrows.

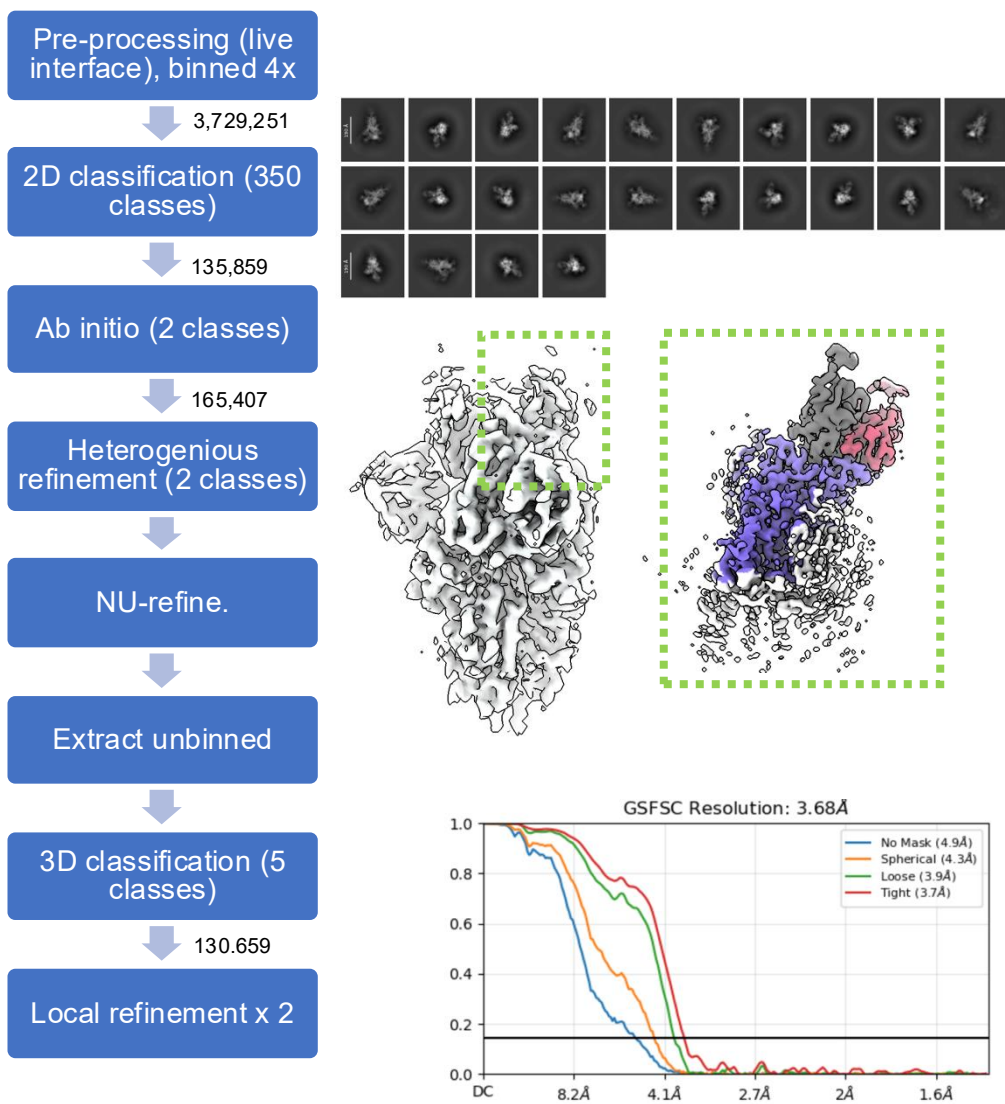

Figure S8. Workflow for processing JN1-6 with KP.3 complex. Numbers of particles after each reduction are written next to processing arrows.

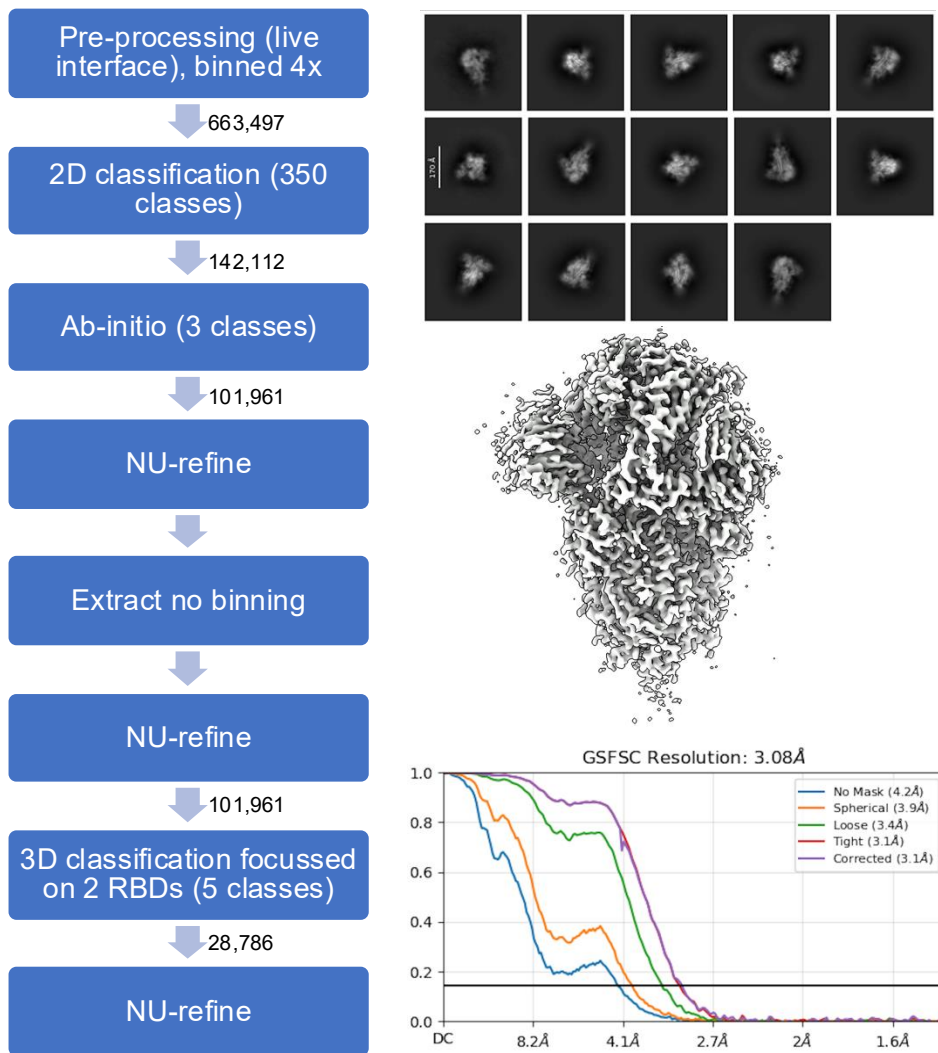

Figure S9. Workflow for cryoEM processing of BA.3.2.2 Spike. Numbers of particles after each reduction are written next to processing arrows. The 2D class averages selected for final processing, final volume and gold standard FSC plot are shown on the right.

Table S1. Patient sample information for Sera PV NT

| Participant number | Sampling date | Timepoint | Latest received vaccine |
|--------------------|---------------|-----------|-------------------------|
| 1                  | 9/25/2024     | V3+336    | Unknown                 |
| 2                  | 9/27/2024     | V3+1052   | Unknown                 |
| 3                  | 10/02/2024    | V3+1063   | Unknown                 |
| 4                  | 10/07/2024    | V5+370    | Unknown                 |
| 5                  | 04/10/2025    | V6+184    | Unknown                 |
| 6                  | 04/10/2025    | V6+170    | JN.1                    |
| 7                  | 04/11/2025    | V6+163    | JN.1                    |
| 8                  | 04/11/2025    | V6 +163   | JN.1                    |
| 9                  | 4/24/2025     | V6+191    | JN.1                    |
| 10                 | 4/24/2025     | V6+170    | JN.1                    |
| 11                 | 4/24/2025     | V6+191    | Unknown                 |
| 12                 | 4/24/2025     | V6+192    | JN.1                    |
| 13                 | 4/25/2025     | V6 + 183  | JN.1                    |
| 14                 | 4/25/2025     | V6+ 186   | JN.1                    |
| 15                 | 4/25/2025     | V3 + 1268 | Unknown                 |
| 16                 | 4/25/2025     | V7 + 188  | JN.1                    |
| 17                 | 4/28/2025     | V6+180    | JN.1                    |
| 18                 | 4/28/2025     | V6+205    | JN.1                    |
| 19                 | 4/30/2025     | V6+162    | Unknown                 |
| 20                 | 05/01/2025    | V3+1232   | Unknown                 |
| 21                 | 05/02/2025    | V4 + 892  | Unknown                 |
| 22                 | 05/02/2025    | V6 +178   | JN.1                    |
| 23                 | 05/02/2025    | V3 + 1269 | Unknown                 |
| 24                 | 05/02/2025    | V6 + 178  | JN.1                    |
| 25                 | 05/07/2025    | V8+27     | JN.1                    |
| 26                 | 05/08/2025    | V6+191    | JN.1                    |
| 27                 | 05/08/2025    | V6+143    | JN.1                    |
| 28                 | 05/08/2025    | V6+189    | JN.1                    |
| 29                 | 05/12/2025    | V6+ 195   | JN.1                    |
| 30                 | 5/16/2025     | V5+535    | Unknown                 |
| 31                 | 5/16/2025     | V6+171    | JN.1                    |
| 32                 | 5/22/2025     | V6+ 220   | JN.1                    |
| 33                 | 10/10/2024    | V5+ 342   | Unknown                 |
| 34                 | 10/11/2024    | V5+ 364   | Unknown                 |
| 35                 | 10/17/2024    | V3 + 1036 | Unknown                 |
| 36                 | 11/29/2024    | V6+30     | JN.1                    |
| 37                 | 12/06/2024    | V6+38     | JN.1                    |
| 38                 | 10/31/2024    | V7 + 26   | JN.1                    |
| 39                 | 11/14/2024    | V6+31     | JN.1                    |
| 40                 | 11/21/2024    | V6+30     | JN.1                    |
| 41                 | 11/25/2024    | V6 +26    | JN.1                    |

Table S2. Patient sample information for antibody isolation

| C-COV19 | Antigen use for sorting | Timepoint | Infection_status | Variant | Swab Date  | Date of 1st post infection sample | Isolated antibodies |
|---------|-------------------------|-----------|------------------|---------|------------|-----------------------------------|---------------------|
| 1       | JN.1-SS KP.3-SS         | V5+89     | PCR+24           | GE.1.2  | 17/12/2023 | 10/01/2024                        | JN.1-1 and 3        |
| 2       | JN.1-SS KP.3-SS         | V5+93     | PCR+21           | EG.5    | 29/12/2023 | 19/01/2024                        | JN.1-4 and 5        |
| 3       | JN.1-SS KP.3-SS         | V5        | PCR+33           | JN.1    | 19/01/2024 | 21/02/2024                        | JN.1-6              |
| 4       | JN.1-SS KP.3-SS         |           | PCR+35           | JN.1    | 16/02/2024 | 22/03/2024                        | JN.1-8 to 13        |

Table S3. JN.1 mAb spreadsheet

| Ab id.  | Sample grouping | Heavy chain                                         |                           |                   |                   |                  | Light chain |                         |                           |                             |                  |
|---------|-----------------|-----------------------------------------------------|---------------------------|-------------------|-------------------|------------------|-------------|-------------------------|---------------------------|-----------------------------|------------------|
|         |                 | V-GENE and allele                                   | V-REGION Nb of AA changes | J-GENE and allele | D-GENE and allele | CDR3-IMGT length | Light Chain | V-GENE and allele       | V-REGION Nb of AA changes | J-GENE and allele           | CDR3-IMGT length |
| JN.1-1  | GE.1.2          | 5-51*01 F                                           | 5                         | 4*02 F            | 4-17*01 F         | 8                | K           | 3-15*01 F               | 13                        | 1*01 F                      | 10               |
| JN.1-3  | GE.1.2          | 5-51*01 F                                           | 8                         | 4*02 F            | 4-17*01 F         | 8                | K           | 3-15*01 F               | 11                        | 1*01 F                      | 10               |
| JN.1-4  | EG.5            | 4-61*01 F                                           | 21                        | 4*02 F            | 3-3*01 F          | 6                | L           | 6-57*03 F               | 14                        | 2*01 F, or 3*01 F           | 9                |
| JN.1-5  | EG.5            | 4-59*01 F, or 4-59*02 F or 4-59*12 (F) or 4-61*12 F | 44                        | 4*02 F            | 3-3*01 F          | 7                | L           | 6-57*03 F               | 19                        | 2*01 F, or 3*01 F           | 9                |
| JN.1-6  | JN.1            | 3-49*04 F                                           | 5                         | 3*02 F            | 3-10*01 F         | 10               | L           | 3-1*01 F                | 6                         | 1*01 F                      | 9                |
| JN.1-8  | JN.1            | 4-30*09 F, or 4-31*03 F                             | 7                         | 1*01 F            | 5-12*01 F         | 7                | L           | 2-14*03 F               | 4                         | 2*01 F, or 3*01 F           | 20               |
| JN.1-9  | JN.1            | 4-30-2*07 F, or 4-30-4*01 F                         | 9                         | 4*02 F            | 3-3*01 F          | 13               | L           | 1-40*02 F               | 1                         | 2*01 F, or 3*01 F           | 12               |
| JN.1-10 | JN.1            | 4-30-2*07 F, or 4-30-4*01 F                         | 8                         | 3*02 F            | 3-3*01 F          | 7                | L           | 1-40*01 F, or 1-40*02 F | 7                         | 2*01 F, or 3*01 F or 3*02 F | 11               |
| JN.1-11 | JN.1            | 4-30-4*09 F, or 4-31*03 F                           | 15                        | 4*02 F            | 3-16*01 F         | 13               | L           | 1-40*01 F               | 13                        | 2*01 F, or 3*01 F           | 11               |
| JN.1-12 | JN.1            | 4-30-4*09 F, or 4-31*03 F                           | 11                        | 5*02 F            | 6-13*01 F         | 16               | L           | 1-40*02 F               | 6                         | 2*01 F, or 3*01 F           | 12               |
| JN.1-13 | JN.1            | 4-30-4*09 F, or 4-31*03 F                           | 8                         | 4*02 F            | 2-8*01 F          | 13               | L           | 2-14*03 F               | 6                         | 2*01 F, or 3*01 F           | 10               |

Table S4. JN.1 mAb neutralisation heat map

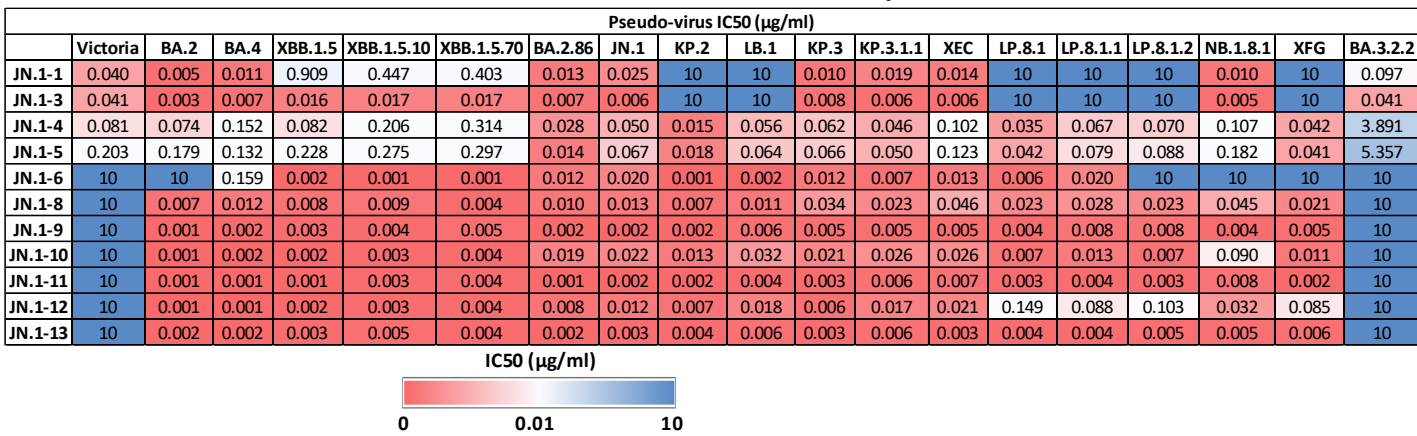

Table S5. Affinity measurement

| Loading      | Analyte  | K <sub>d</sub> (nM) |      |      |     | k <sub>off</sub> (1/s) |          |          |          |
|--------------|----------|---------------------|------|------|-----|------------------------|----------|----------|----------|
|              |          | 1                   | 2    | 3    | Avg | 1                      | 2        | 3        | Avg      |
| RBD-WH       | ACE2-His | 218                 | 205  | 224  | 216 | 8.95E-03               | 9.72E-03 | 8.71E-03 | 9.12E-03 |
| RBD-BA.1     | ACE2-His | 192                 | 189  | 165  | 182 | 5.07E-03               | 4.67E-03 | 4.58E-03 | 4.77E-03 |
| RBD-KP.3     | ACE2-His | 101                 | 85.7 | –    | 93  | 3.55E-03               | 2.91E-03 | –        | 3.23E-03 |
| RBA-BA.3.2.2 | ACE2-His | 68.2                | 57.2 | 72.6 | 66  | 2.16E-03               | 2.02E-03 | 2.36E-03 | 2.18E-03 |

Table S6. Data collection, structure determination and refinement statistics

| Method                              | X-ray<br>Crystallography                |                                            | Cryo-EM                                        |                                                  |                                                |                            |                     |
|-------------------------------------|-----------------------------------------|--------------------------------------------|------------------------------------------------|--------------------------------------------------|------------------------------------------------|----------------------------|---------------------|
| Structure                           | Delta-<br>RBD/JN.1-4<br>Fab             |                                            | KP.3-<br>RBD/JN.1-9<br>Fab local<br>refinement | KP.3-<br>RBD/JN.1-<br>10 Fab local<br>refinement | KP.3-<br>RBD/JN.1-6<br>Fab local<br>refinement | KP.3-<br>RBD/JN.1-3<br>Fab | BA.3.2.2<br>Spike   |
| PDB/EMBD ID                         | 9TXF                                    |                                            | 9SF7/<br>EMD-54815                             | 29RE/ EMD-<br>57321                              | 9SF5/ EMD-<br>54814                            | 9SHB/ EMD-<br>54894        | 29SU/ EMD-<br>57358 |
| <b>Data collection</b>              |                                         |                                            |                                                |                                                  |                                                |                            |                     |
| Space group                         | $P2_1$                                  | Voltage (kV)                               | 300                                            | 300                                              | 300                                            | 300                        | 300                 |
| Cell dimensions                     |                                         | Frames (EER<br>fractions)                  | 50                                             | 50                                               | 50                                             | 50                         | 50                  |
| $a, b, c$ (Å)                       | 42.3, 182.4,<br>102.3                   | Dose rate ( $e^-/\text{Å}^2/\text{s}$ )    | 9.5                                            | 9.5                                              | 9.2                                            | 8.5                        | 9.3                 |
| $a, b, g$ (°)                       | 90, 99.7, 90                            | Total dose ( $e^-/\text{Å}^2$ )            | 50                                             | 50                                               | 50                                             | 50                         | 50                  |
| Resolution (Å)                      | 68–2.32<br>(2.36–<br>2.32) <sup>a</sup> | Calibrated pixel<br>size (Å <sup>2</sup> ) | 0.7303                                         | 0.7303                                           | 0.7303                                         | 0.729                      | 0.7303              |
| $R_{\text{merge}}$                  | 0.179 (–)                               | Defocus (µm), 0.3<br>increments            | -0.8 to -2.6                                   | -0.8 to -2.6                                     | -0.8 to -2.6                                   | -0.8 to -2.6               | -0.8 to -2.6        |
| $R_{\text{pim}}$                    | 0.073<br>(0.898)                        | Movies                                     | 7,574                                          | 9,189                                            | 18,432                                         | 6,672                      | 1,977               |
| $I/s(I)$                            | 8.1 (0.6)                               | Particles (final)                          | 108,638                                        | 116,770                                          | 130,659                                        | 171,600                    | 28,786              |
| $CC_{1/2}$                          | 0.998<br>(0.316)                        | Symmetry                                   | C1                                             | C1                                               | C1                                             | C1                         | C1                  |
| Completeness (%)                    | 100 (98.3)                              | Map resolution (Å)                         | 3.5                                            | 3.2                                              | 3.7                                            | 3.7                        | 3.1                 |
| Redundancy                          | 7.0 (7.2)                               | Sharpening B-<br>factor (Å <sup>2</sup> )  | 68                                             | 95                                               | 122                                            | 82                         | 41                  |
| <b>Refinement</b>                   |                                         |                                            |                                                |                                                  |                                                |                            |                     |
| Resolution (Å)                      | 68–2.32                                 | Resolution (Å)                             | 3.5                                            | 3.2                                              | 3.7                                            | 3.7                        | 3.1                 |
| No. reflections                     | 63,620/<br>1,979                        | No. residues                               | 3,291                                          | 3,320                                            | 3,388                                          | 3,412                      | 2,999               |
| $R_{\text{work}} / R_{\text{free}}$ | 0.215/<br>0.249                         | $B$ factors (Å <sup>2</sup> )              | 53                                             | 52                                               | 62                                             | 116                        | 83.4                |
| No. atoms                           |                                         | r.m.s. deviations                          |                                                |                                                  |                                                |                            |                     |
| Protein                             | 9,582                                   | Bond lengths<br>(Å)                        | 0.002                                          | 0.002                                            | 0.003                                          | 0.002                      | 0.003               |
| Ligand/ion/water                    | 292                                     | Bond angles (°)                            | 0.4                                            | 0.4                                              | 0.5                                            | 0.5                        | 0.5                 |
| $B$ factors (Å <sup>2</sup> )       |                                         | Clash score                                | 5.4                                            | 6.0                                              | 6.2                                            | 5.5                        | 2.9                 |
| Protein                             | 68                                      | Ramachandran<br>outlier (%)                | 0                                              | 0                                                | 0                                              | 0                          | 0                   |
| Ligand/ion/water                    | 56                                      | Rotamer outlier<br>(%)                     | 1.1                                            | 1.7                                              | 1.6                                            | 1.9                        | 1.7                 |
| r.m.s. deviations                   |                                         | d FSC model (0.5,<br>Å)                    | 3.9                                            | 3.3                                              | 3.9                                            | 7.9                        | 3.1                 |
| Bond lengths (Å)                    | 0.002                                   | CC (mask)                                  | 0.67                                           | 0.82                                             | 0.80                                           | 0.56                       | 0.84                |
| Bond angles (°)                     | 0.5                                     |                                            |                                                |                                                  |                                                |                            |                     |
